# Supplementary material
Source: PubMed Central journal article supplement (PMC2781659)
Supplement: supp_M109.040907_Revised_Supplemental.pdf [file supp_M109.040907_Revised_Supplemental.pdf]

**A**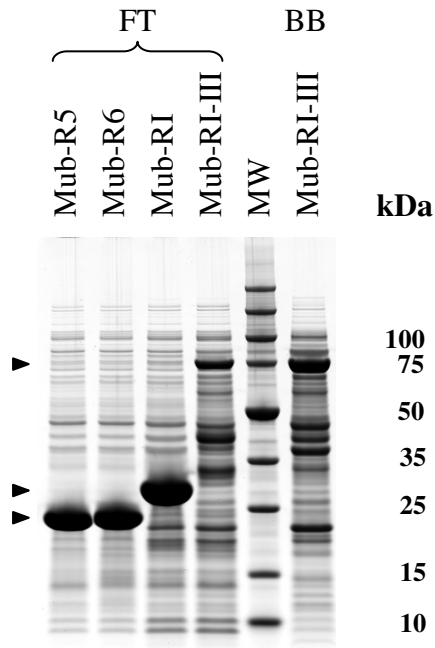**B**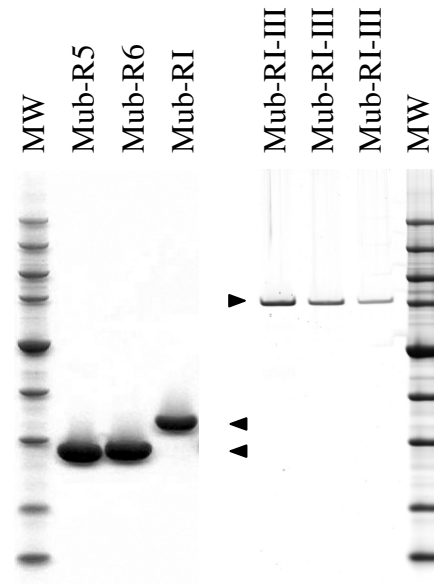**C**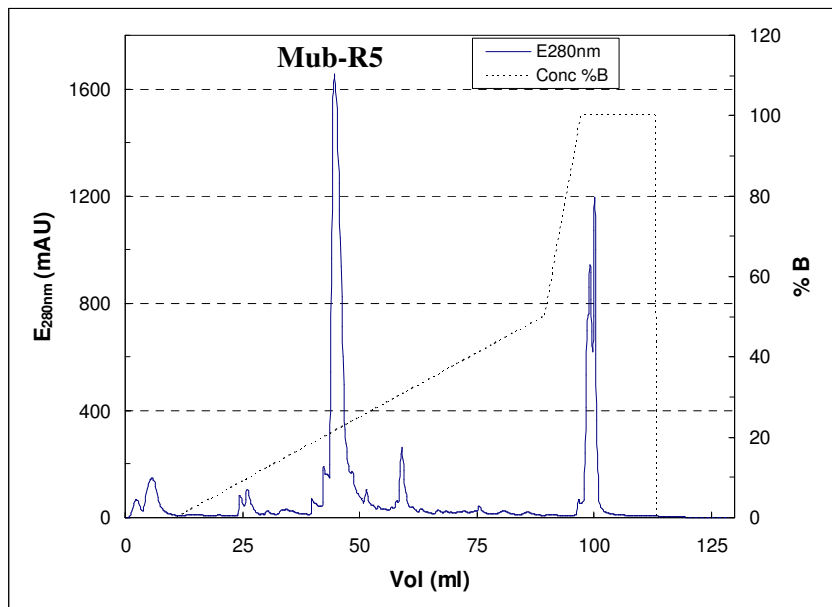

Supplemental Figure S1

A

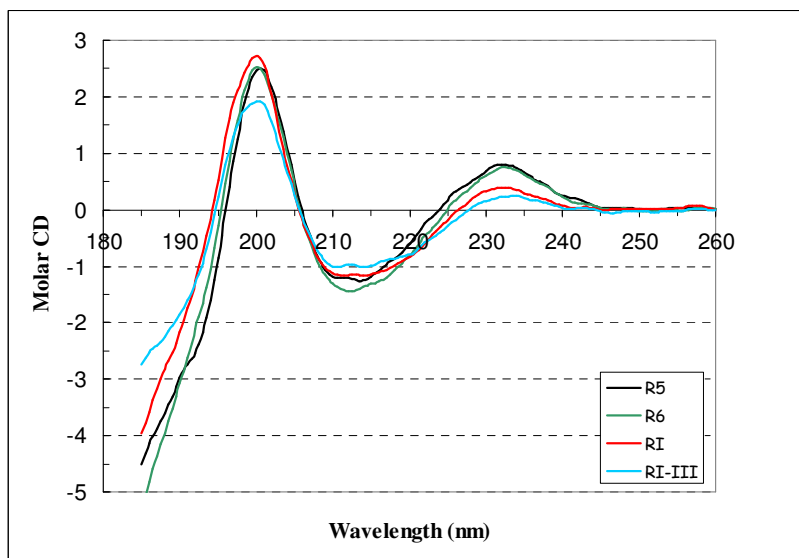

B

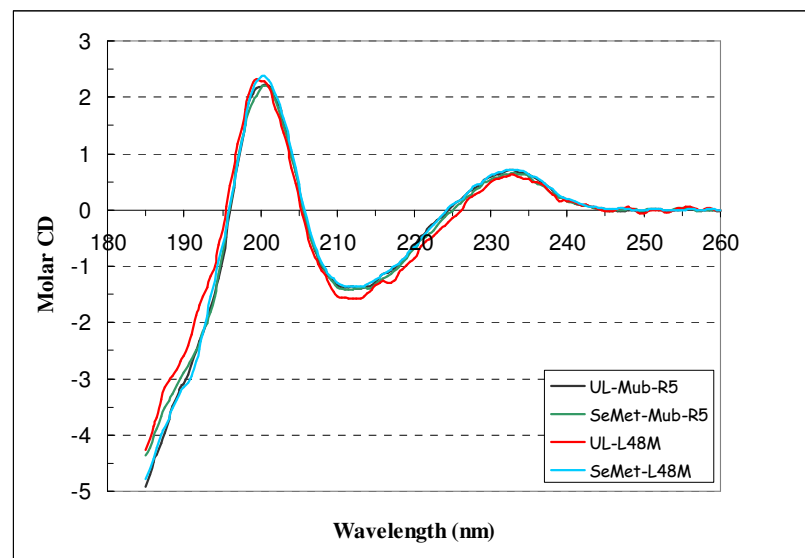

C

| Sample       | $\alpha$ -helix |           | $\beta$ -sheet |           | $\beta$ -turn | Unordered<br>(random) | % total<br>$\alpha$ -helix | % total<br>$\beta$ -sheet & $\beta$ -turn | % total<br>unordered | Total % |
|--------------|-----------------|-----------|----------------|-----------|---------------|-----------------------|----------------------------|-------------------------------------------|----------------------|---------|
|              | random          | distorted | random         | distorted |               |                       |                            |                                           |                      |         |
| Mub-R5       | 0.002           | 0.001     | 0.277          | 0.160     | 0.211         | 0.349                 | 0.3                        | 64.8                                      | 34.9                 | 100     |
| Mub-R6       | 0.002           | 0.001     | 0.242          | 0.156     | 0.222         | 0.376                 | 0.3                        | 62.0                                      | 37.6                 | 100     |
| Mub-RI       | 0.001           | 0.009     | 0.294          | 0.148     | 0.222         | 0.326                 | 1.0                        | 66.4                                      | 32.6                 | 100     |
| Mub-RI-III   | 0.000           | 0.015     | 0.282          | 0.138     | 0.224         | 0.341                 | 1.5                        | 64.4                                      | 34.1                 | 100     |
| UL-Mub-R5    | 0.003           | 0.000     | 0.256          | 0.161     | 0.208         | 0.372                 | 0.3                        | 62.5                                      | 37.2                 | 100     |
| SeMet-Mub-R5 | 0.003           | 0.001     | 0.249          | 0.149     | 0.212         | 0.387                 | 0.4                        | 61.0                                      | 38.6                 | 100     |
| UL-L48M      | 0.003           | 0.001     | 0.254          | 0.146     | 0.218         | 0.378                 | 0.4                        | 61.8                                      | 37.8                 | 100     |
| SeMet-L48M   | 0.002           | 0.001     | 0.258          | 0.157     | 0.221         | 0.361                 | 0.3                        | 63.6                                      | 36.1                 | 100     |

Supplemental Figure S2

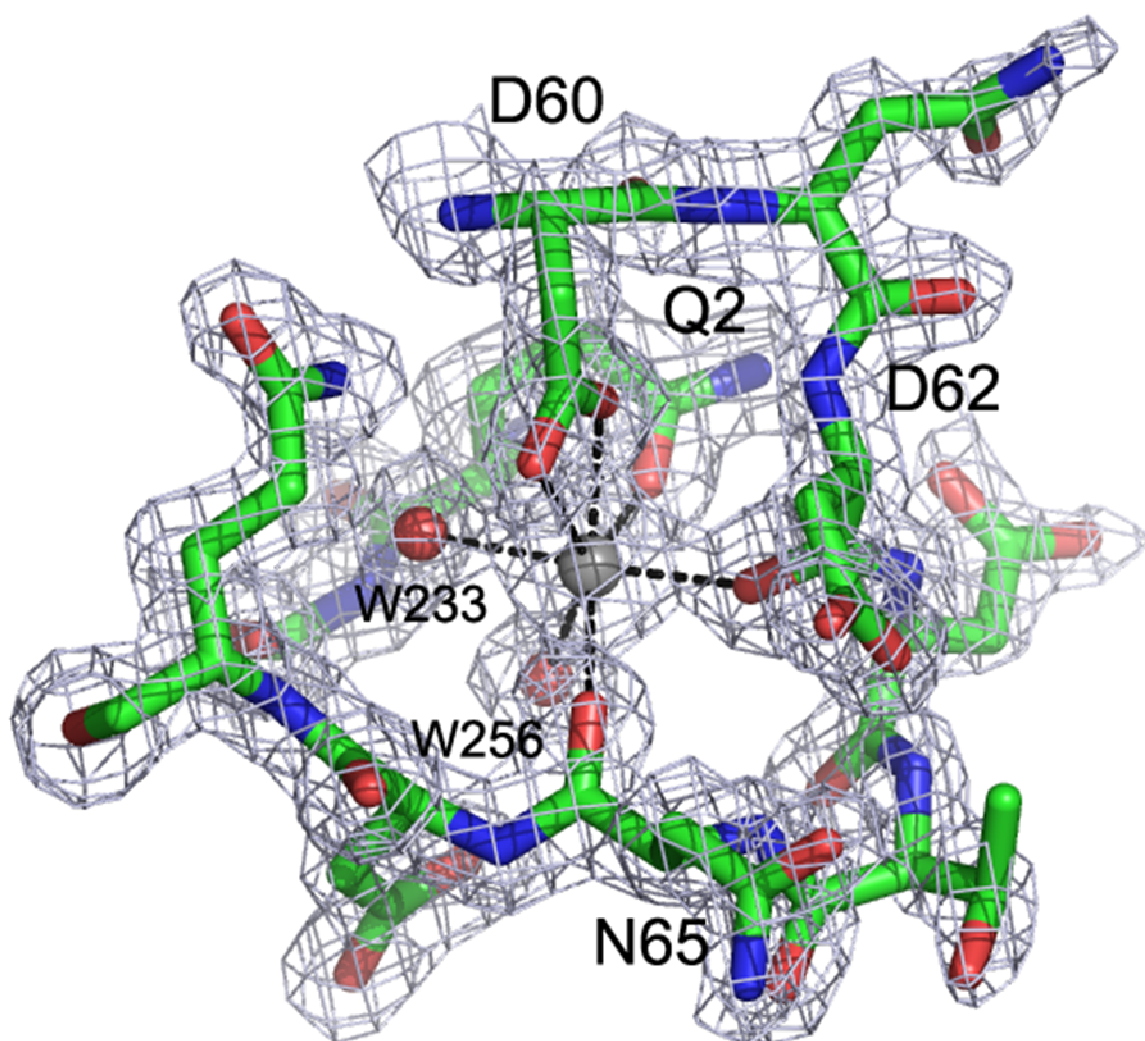

Supplemental Figure S3

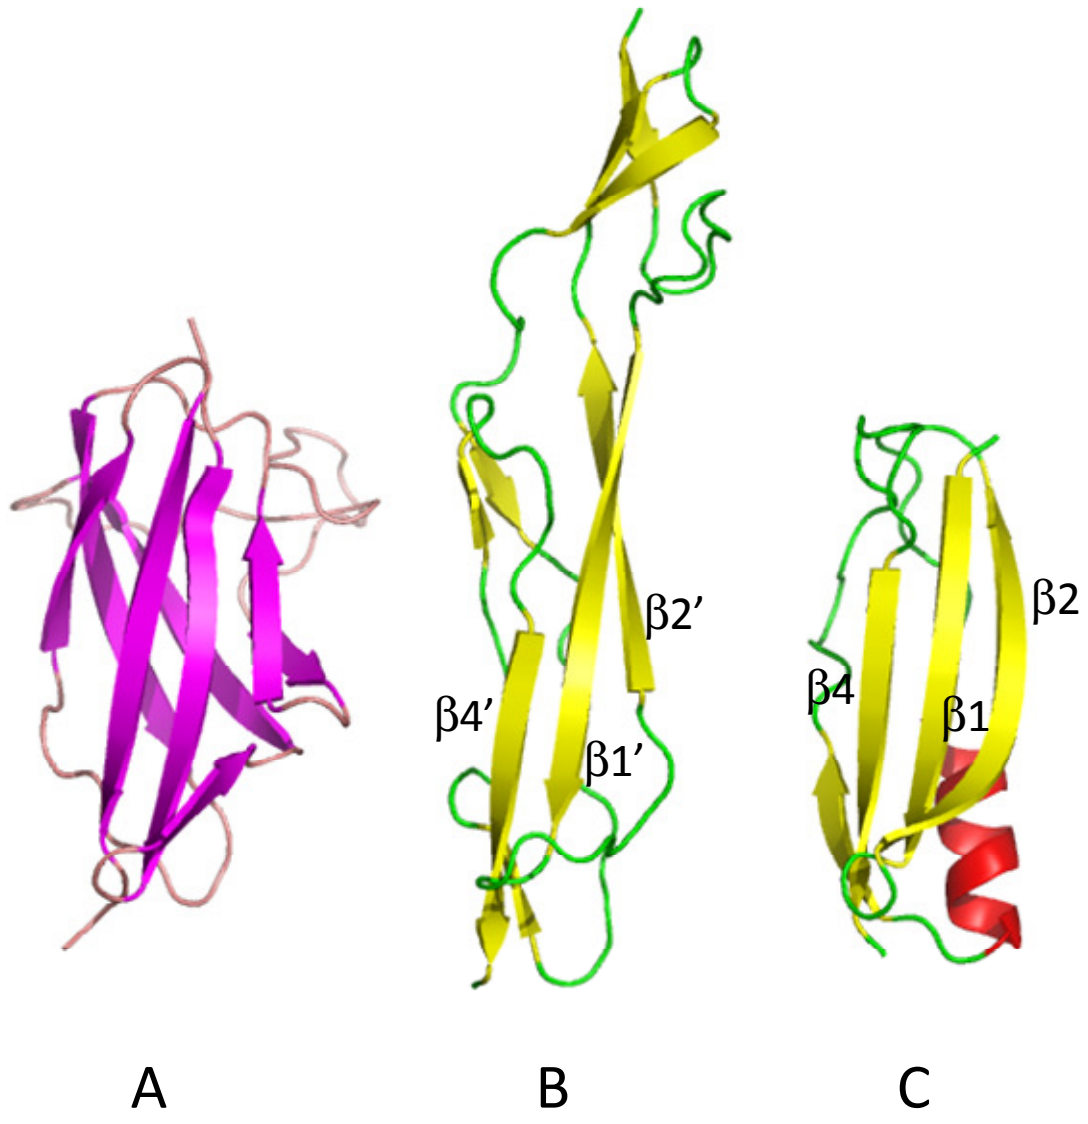

Supplemental Figure S4

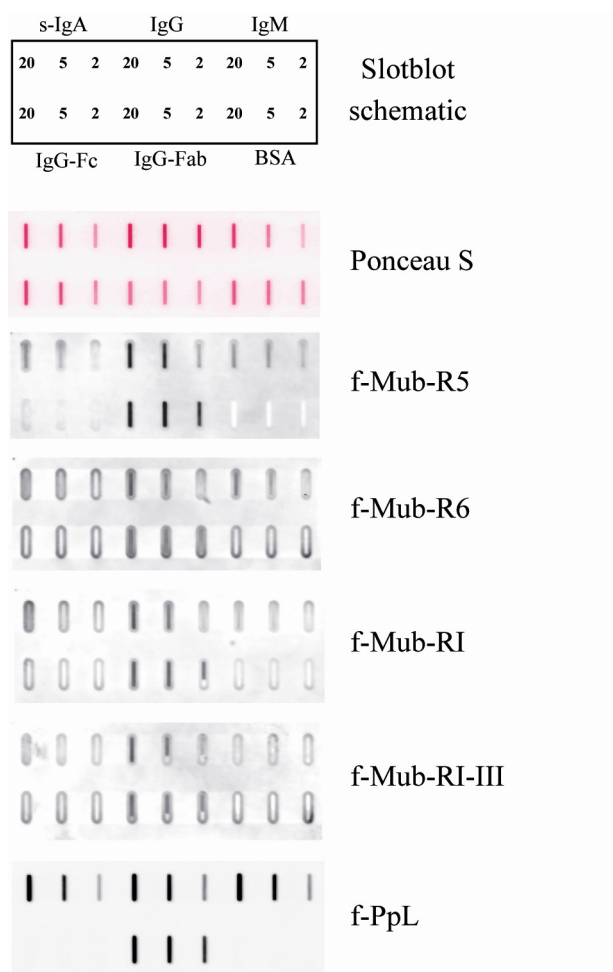

**Supplemental Figure S5**
